1 The effect of emotion regulation on emotional eating among  
2 undergraduate students in China: the chain mediating role of  
3 impulsivity and depressive symptoms

4  
5  
6  
7 Huimin Yang<sup>1¶</sup>, Xinyi Zhou<sup>1¶</sup>, Longjiao Xie<sup>2</sup>, Jing Sun<sup>3\*</sup>

8  
9  
10  
11 1 School of Nursing, Peking University, Beijing, China

12 2 School of Nursing, Peking University, Beijing, China

13 3 Department of Community Nursing, C of Nursing, Peking University, Beijing, China

14  
15  
16 \* Correspondence author

17 E-mail: [sunjing99@bjmu.edu.cn](mailto:sunjing99@bjmu.edu.cn) (JS)

18 ¶ These authors contributed equally to this work.

19  
20  
21  
22  
23 **NOTE: This preprint reports new research that has not been certified by peer review and should not be used to guide clinical practice.**

24

## 1     **Abstract**

2           This study aimed to examine the relationship between difficulties in emotion  
3 regulation and emotional eating and the role of impulsivity and depressive symptoms  
4 in mediating this chain. Four hundred ninety-four undergraduate students participated  
5 in the study. A self-designed questionnaire was used in the survey from February 6 to  
6 13, 2022, to finish our purpose, including the Emotional Eating Scale (EES-R),  
7 Depression Scale (CES-D), the Short Version of the Impulsivity Behavior Scale (UPPS-  
8 P) and Difficulties in Emotion Regulation Scale (DERS). Results showed that 1) There  
9 was a positive correlation between difficulties in emotion regulation, impulsivity,  
10 depressive symptoms, and emotional eating, respectively. 2) Impulsivity and depressive  
11 symptoms mediated the relationship between emotion regulation and emotional eating  
12 separately. 3) Impulsivity and depressive symptoms played the mediating chain role  
13 between emotion regulation and emotional eating.

## 14    **Keywords**

15    Emotional eating, difficulties in emotion regulation, impulsivity, depressive symptoms,  
16    chain mediation effect, university students

## 18    **Introduction**

19           Eating disorders are characterized by persistent disordered eating behaviors that  
20 interfere with daily social and psychological functioning[1]. The global incidence of  
21 eating disorders in 2019 was 41.9 million all over the world and caused 6.6 million  
22 Disability-Adjusted Life Years (DALYs) in that year [2]. Patients with eating disorders  
23 described their binge eating behaviors as a result of negative emotions[3]. Emotional  
24 eating (EE) is combating negative emotions by engaging in binge eating behaviors[4,

1 5]. The number of people who have EE was continually increasing over the past years  
2 [6]. EE affects people of all ages, and approximately 20% of people regularly adopt  
3 emotional eating behaviors[7]. The researcher found that adults aged 21 to 39 are much  
4 more likely to have EE [7]. Ashley’s study noted that approximately 10% to 60% of  
5 adolescents are emotional eaters[8].

6 Evidence of a follow-up study showed that EE impel people to overeat and cause  
7 weight gain[9]. Notably, EE was particularly related to the preference for sweet and  
8 high-fat foods ,which can lead to excessive intake of high energy-density foods and  
9 promote the occurrence of obesity[10]. Researchers also pay attention to the relationship  
10 between EE and weight loss[11], and found that EE hinder the weight loss[12], and the  
11 higher level of EE related to the less weight loss over the same period[13, 14]. As an  
12 abnormal eating behavior, EE is the trigger for gastrointestinal disorders, which was  
13 found to be a factor causing pharyngeal reflux and acid reflux[6].

14 Emotion regulation is defined as the ability to cope with negative emotions in an  
15 adaptive way[15]. Difficulties in emotion regulation were found among obese  
16 adolescence with emotional eating[16], which was proven to be one factor of  
17 overeating[17, 18]. Poor emotion regulation was related to impulsivity[19] and  
18 depression [20], both of which were showed have a positive connection with emotional  
19 eating[21, 22].

20 Impulsivity is recognized as the rapid and unplanned reactions to stimulation  
21 without thinking about the negative consequences of these reactions[23]. It is a  
22 multidimensional construct that involves attentional, behavioral, cognitive components  
23 [24] and has been reported frequently for years[25, 26]. Data from a large national sample  
24 of the United States population showed that nearly 20% of the participants have  
25 impulsivity, especially among younger individuals [27]. 40% of children and 58.3% of  
26 adults had higher clinically elevated impulsivity indicated by the data in 2011[28].

1 Depression is an unusually low and unpleasant mood-altering negative emotional  
2 state that harms personal life and society [29].The World Health Organization reports  
3 that the global prevalence of depression is as high as 12.8%[30]. College students have  
4 more negative emotions due to their high academic pressure, uncertain employment  
5 prospects and other problems[31]. Study elucidated that the prevalence of depressive  
6 symptoms among college students is increasing[32].Approximately 23.8% of first-year  
7 university students have depressive symptoms[33] and more than 30% of university  
8 students have depression[34].

9 Although emotional eating has been studied for years, few studies have examined  
10 emotional eating among undergraduate students and the specific mechanism between  
11 emotion regulation and emotional eating. Thus, in this study, we discuss the effect of  
12 emotion regulation on emotional eating and the internal mechanisms among  
13 undergraduate students, that is, the mediating role of impulsivity and depressive  
14 symptoms in the relationship between emotion regulation and emotional eating. The  
15 study aim to give scientific suggestions to reduce the incidence of emotional eating. The  
16 results stress the significance of regulating emotions in a correct and efficient way,  
17 while paying attention to the impulsivity and depressive symptoms among  
18 undergraduate student and giving an early intervention also can contributes to solve the  
19 problem.

## 20 **Emotion regulation and emotional eating**

21 Difficulties in emotion regulation lead to unhealthy eating behaviors[35, 36],  
22 especially binge eating[37]. The escape model explained that individuals who have  
23 difficulties in emotion regulation may erode the usual inhibitions around food, and made  
24 people be willing to escape the negative emotions by breaking their dietary rules and  
25 restricting their focus to eating itself[38, 39]. Emotion regulation and eating disorders

1 had positive relations, proofed by a multiple correlation analysis in Italian university  
2 students[40]. Gianini investigated 326 obese and binge-eating adults and found that  
3 difficulties in emotion regulation can predict emotional eating[37]. A study among 552  
4 undergraduate students demonstrated that difficulties in emotion regulation contribute  
5 greatly to emotional eating[36]. Although previous studies have proven the relationship  
6 between emotional regulation and emotional eating, the relationship still needs to be  
7 explored in Chinese undergraduate students. Therefore, we put forward the following  
8 hypothesis:

9 H1: Difficulties in emotion regulation are positively correlated with emotional  
10 eating among Chinese undergraduate students.

## 11 **The mediating role of impulsivity**

12 Impulsivity is one of the mental dimensions taking part in emotion regulation[41],  
13 which is generally regarded as a consequence of impaired executive functioning. Prior  
14 work proved that emotion dysregulation was related to impulsive behaviors( $r=0.31, p<$   
15  $0.1$ )[42]. Multivariable analysis indicated that eating disorders are positively associated  
16 with impulsivity in obese people[43]. A sample contained 121 obese participants with  
17 binge eating behaviors were proved having high impulsivity with average score of 31.11  
18 assessed by UPPS-P Impulsive Behavior Scale[43].In conclusion, emotional regulation  
19 may influence emotional eating through impulsivity. Therefore, we put forward the  
20 following hypothesis:

21 H2: Impulsivity plays a mediating role in Difficulties in Emotion Regulation and  
22 Emotional Eating among Chinese undergraduate students.

## 23 **The mediating role of depressive symptoms**

24 Depression was taken for a result of inappropriate emotion regulation[44].A study  
25 conducted among university students indicated that, individuals with depression had

1 more difficulties in emotion regulation[45]. The results from random effects analyses  
2 pointed those difficulties in emotion regulation was connected with depressive  
3 symptoms[46]. Researchers used an emotion-provoking film to increase the negative  
4 emotion of participants and showed that difficulties in emotion regulation were related  
5 to higher levels of depression symptoms [47]. Braden carried out an experiment among  
6 adults with overweight or obesity and indicated that taking eating as a response to  
7 depression was most closely related to emotion regulation difficulties [48]. A study  
8 conducted in a random sample of 10,000 people in Finland revealed that emotional  
9 eating is associated with an increase of depression[49]. To summarize, difficulties in  
10 emotion regulation related to depressive symptoms, and depressive symptoms can  
11 predict emotional eating. Thus, we pose Hypothesis 3:

12 H3: Depressive symptoms play a mediating role in Difficulties in Emotion  
13 Regulation and Emotional Eating among Chinese undergraduate students.

## 14 **The chain mediating role of emotion regulation and emotional** 15 **eating**

16 Increased impulsivity and negative mood may be amplified by difficulties in emotion  
17 regulation among overweight people, which was found by Leehr's experiment using  
18 electroencephalography and eye tracking[50]. A study among adolescents aged 13–21  
19 years implied that difficulties with impulse control can result in emotional eating when  
20 they have a negative mood[51]. A large cohort of study conducted in adults revealed that,  
21 impulsivity, as a distinct personality factor, gives rise to one set of depressive illnesses in  
22 adults [52]. Previous research in adolescents have suggested that impulsivity is related to  
23 rumination, self-blaming and catastrophe[53]. Impulsivity also lead adolescents to  
24 encounter adverse situations, which, in turn, result in depression[54]. Above all, difficulties  
25 in emotion regulation issue in emotional eating and are also related to impulsivity and

1 negative mood. Meanwhile, depression is a typical negative mood. Therefore, we speculate  
2 that impulsivity and depressive symptoms can mediate the relationship between emotion  
3 regulation and emotional eating. Therefore, we have the following hypothesis:

4 H4: Impulsivity and depressive symptoms play a chain mediating role in difficulties  
5 in emotion regulation and emotional eating among Chinese undergraduate students.

## 6 **Materials and methods**

### 7 **Data source**

8 According to the principle of multivariate statistical analysis, the estimated sample  
9 size was 5 times the number of observation indexes[55]. Given that there is a potential  
10 10 percent missing samples, 467 samples were planned to be included. A questionnaire  
11 survey was developed and administered from February 6 to 13, 2022. This study  
12 selected students who were in a university. The exclusion criteria were ① completing  
13 the questionnaire in less than 100 seconds, ② the choices showed a clear pattern, and  
14 ③ age was older than 18 years or younger than 26 years. By using a professional  
15 platform named Wenjuanxing ([HTTP://www.xjn.cn](http://www.xjn.cn)), the questionnaires were  
16 distributed to the students via We Chat, which is an app that supplies communication  
17 services and is used widely in China. Students who saw the questionnaires and were  
18 willing to participate could complete them via mobile phone during free time. The  
19 registered users monitored the collected questionnaires in no time and eliminated  
20 invalid questionnaires with no self-reported hearing impairment, with all the same  
21 answers, or with inconsistent forward and reverse answers.

22 Research Ethics Committee approval was obtained from the IRB of Peking  
23 University (No. IRB00001052-21150). Before conducting the online survey, the  
24 participants were informed that involvement was completely voluntary and anonymous.

1 In addition, we introduced the purpose of the study again in the guidelines of each  
2 questionnaire and emphasized the confidentiality of the survey.

### 3 **Measures**

#### 4 **Emotional eating**

5 Zhu Hong (2012) revised the Chinese version of the Emotional Eating Scale (EES-  
6 R), adding the positive emotional dimension to the original scale[56]. There are 23 items  
7 divided into four dimensions: depression, anxiety, anger and positivity. Responses  
8 ranged from 1 to 5, with 1 representing a total lack of these emotions and 5 indicating a  
9 high degree of emotion. The higher the score, the higher the desire to eat in a certain  
10 mood. The Cronbach's alpha coefficient in this study was 0.935.

#### 11 **Emotion regulation**

12 Gratz developed the difficulties in Emotion Regulation Scale (DERS) and his team  
13 in 2004[57]. The scale is a total of 36 items, which can be divided into six dimensions:  
14 difficulty in emotional awareness, difficulty in emotional understanding, difficulty in  
15 impulse control, difficulty in goal orientation, difficulty in accepting emotional  
16 responses, and difficulty in effectively using regulatory strategies. Each item's responses  
17 range from 1 (never) to 4 (always). Item 11 is scored in reverse. The higher the score is,  
18 the more serious the emotion regulation difficulty is and the lower the emotion regulation  
19 ability is. In this study, the Cronbach's alpha coefficient was 0.934.

#### 20 **Impulsivity**

21 The short version of the UPPS-P Impulsive Behavior Scale (UPPS-P) is a 20-point  
22 evaluation of five different impulsive personality traits that demonstrate conceptual  
23 validity [58]. Responses to questions ranged from 1 (strongly agree) to 4 (strongly  
24 disagree), with higher scores indicating stronger negative urgency. In this study, the  
25 Cronbach's alpha coefficient was 0.834.



## 1 **Depressive symptoms**

2           The Center for Epidemiological Survey, Depression Scale (CES-D) was developed  
3 by Radloff, National Institute of Psychiatry in 1977[59]. The scale has a total of 20 items,  
4 each of which measures one symptom. According to the frequency of symptoms  
5 occurring in the last week, each item response ranged from 0 (none or very few) to 3  
6 (disagree strongly), and 4, 8, 12 and 16 were scored in reverse. A score less than or  
7 equal to 15 indicates no depressive symptoms, 16-19 is likely to have depressive  
8 symptoms, and 20 indicates depression symptoms. The Cronbach's alpha coefficient  
9 was 0.884.

## 10 **Data analysis**

11           All statistical analyses were performed with SPSS 25.0. At the outset of the data  
12 analysis, descriptive statistics and statistical analyses were used to assess whether  
13 emotional feeding was correlated with other variables in the intended direction. The  
14 Pearson product-moment correlation coefficient ( $r$ ) was used in the correlation analysis.  
15 The range from -1 to 1 and the values of 0.1, 0.3, and 0.5 represent “small”, “medium”,  
16 and “high” correlations, respectively [60]. In the hierarchical regression analysis, the  
17 contribution of all these components to emotional eating was examined by including all  
18 components of reading fluency in the final model. Model 6 of the SPSS process plug-in  
19 was used to test the chain mediation model. For the significance test of the regression  
20 coefficient, the bootstrapping method with 5,000 repeated samples was selected to  
21 obtain a robust[61].

## 22 **Results**

### 23 **Sociodemographic characteristics and descriptive analysis**

24           A total of 506 questionnaires were collected across 25 Chinese provinces (N= 264

1 in Beijing, N=80 in Guangdong, N= 19 in Shandong and N= 131 in other provinces).

2 The final sample size was 494, with an effective valid response rate of 97.7%.

3 The sample of this study were undergraduate students whose average age was 20.1  
4 ± 1.9 years old. The descriptive statistics are shown in Table 1. The majority of the  
5 participants was female (62.8%), while 184 males were included. There were 340 junior  
6 grade students in our study, accounted for 68.8%, and the rest of participants were senior  
7 students (N=154,31.2%).

8 **Table1. Descriptive statistics of demographic variables (N=494)**

| Characteristics              | N (%)<br>/Mean (SD) | Emotional<br>Eating median<br>(IQR) | r/F      | P     |
|------------------------------|---------------------|-------------------------------------|----------|-------|
| Age                          | 20.13(1.858)        |                                     | 0.220*** | 0.000 |
| BMI                          | 21.64(5.111)        |                                     | 0.006    | 0.887 |
| Gender                       |                     |                                     | 3.427**  | 0.001 |
| Male                         | 184(37.2)           | 64.00(24.00)                        |          |       |
| Female                       | 310(62.8)           | 58.50(21.00)                        |          |       |
| Grade level                  |                     |                                     | 0.193    | 0.661 |
| Junior                       | 340 (68.8)          | 59.55(22.00)                        |          |       |
| Senior                       | 154 (31.2)          | 64.42(23.00)                        |          |       |
| Average<br>Monthly<br>Income |                     |                                     | 4.552*   | 0.011 |
| ¥0-3000                      | 60(12.1)            | 69.00(25.50)                        |          |       |
| ¥3000-5000                   | 165(33.4)           | 60.00(21.00)                        |          |       |
| ¥5000 or more                | 269(54.5)           | 60.00(24.00)                        |          |       |

9 Note: \*p<0.05, \*\*p<0.01, \*\*\*p<0.001

10 Emotional eating was associated with age, gender, grade and income. Statistical  
11 analyses indicated that age (r = 0.220; P = 0.000) and gender (t = 3.427; P = 0.001) were  
12 significantly associated with emotional eating. Males were reported greater  
13 emotional eating than females. Senior grade in university reported insignificantly

1 greater emotional eating than junior ( $P = 0.661$ ). Individuals with a monthly income less  
2 than ¥3000 reported significantly greater emotional eating compared to individuals  
3 making more than ¥3000 a month ( $P = 0.011$ ).

## 4 **Pearson correlation analysis**

5 There was a significantly correlated relationship among difficulties in emotion  
6 regulation, impulsivity, depressive symptoms and emotional eating. As shown in Table  
7 2, Pearson correlation analyses revealed that there was a medium positive correlation of  
8 emotional eating and depressive symptoms ( $r = 0.363$ ,  $p < 0.01$ ), difficulties in emotion  
9 regulation ( $r = 0.260$ ,  $p < 0.01$ ) and impulsivity ( $r = 0.382$ ,  $p < 0.01$ ). Impulsivity was found  
10 to be moderately positive correlated with depressive symptoms ( $r = 0.422$ ,  $p < 0.01$ ) and  
11 difficulties in emotion regulation ( $r = 0.473$ ,  $p < 0.01$ ). The correlation between depressive  
12 symptoms and difficulties in emotion regulation was high ( $r = 0.656$ ,  $p < 0.01$ ). The results  
13 showed that there were significant positive correlations between difficulties in emotion  
14 regulation, impulsivity and depressive symptoms, supporting hypothesis 1.

15 **Table 2. Descriptive statistics and correlations among study variables (N=494)**

|            | M      | SD     | 1        | 2        | 3        | 4    |
|------------|--------|--------|----------|----------|----------|------|
| 1 CES-D    | 19.83  | 12.094 | 1.00     |          |          |      |
| 2 DERS     | 101.27 | 18.810 | 0.656*** | 1.00     |          |      |
| 3 S-UPPS-P | 51.73  | 8.021  | 0.422*** | 0.473*** | 1.00     |      |
| 4 EES      | 61.06  | 17.460 | 0.363*** | 0.260*** | 0.382*** | 1.00 |

16 Note: \*\*\* $p < 0.001$

## 17 **Hierarchical regression analysis**

18 Impulsivity may mediate difficulties in emotion regulation and emotional eating.  
19 At the first stage (Model 1), difficulties in emotion regulation were added to the model  
20 and significantly predicted emotional eating ( $\beta = 0.221$ ,  $p < 0.001$ ). At the second  
21 stage (Model 2), impulsivity was included in the model, and difficulties in emotion

1 regulation significantly predicted impulsivity ( $\beta = 0.445, p < 0.001$ ). At the third stage  
 2 (Model 3), difficulties in emotion regulation ( $\beta = 0.572, p < 0.001$ ) and impulsivity  
 3 ( $\beta = 0.127, p < 0.05$ ) significantly and positively predicted depressive symptoms. In  
 4 the fourth stage (Model 4), the addition of impulsivity and depressive symptoms to the  
 5 model led to a distinct change in the beta value of difficulties in emotion regulation, and  
 6 difficulties in emotion regulation no longer made a significant contribution to emotional  
 7 eating. These results indicate that impulsivity and depressive symptoms may have a  
 8 chain mediating role in the relationship between difficulties in emotion regulation and  
 9 emotional eating.

10 **Table 3. Hierarchical regression analysis with emotion regulation, impulsivity,**  
 11 **depression and emotional eating**

| Variables | Model 1       |              |       | Model 2       |               |       | Model 3       |               |       | Model 4       |              |       |
|-----------|---------------|--------------|-------|---------------|---------------|-------|---------------|---------------|-------|---------------|--------------|-------|
|           | EES-R         |              |       | UPPS-P        |               |       | CES-D         |               |       | EES-R         |              |       |
|           | $\beta$       | t            | P     | $\beta$       | t             | P     | $\beta$       | t             | P     | $\beta$       | t            | P     |
| DERS      | 0.221         | 5.098*<br>** | 0.000 | 0.445         | 11.067<br>*** | 0.000 | 0.572         | 15.042<br>*** | 0.000 | -0.060        | -1.083       | 0.279 |
| UPPS-P    |               |              |       |               |               |       | 0.127         | 3.314*<br>*   | 0.001 | 0.283         | 6.093*<br>** | 0.000 |
| CES-D     |               |              |       |               |               |       |               |               |       | 0.247         | 4.548*<br>** | 0.000 |
| R2        | 0.121         |              |       | 0.246         |               |       | 0.462         |               |       | 0.228         |              |       |
| F         | 13.464<br>*** |              | 0.000 | 31.796<br>*** |               | 0.000 | 69.824<br>*** |               | 0.000 | 20.555<br>*** |              | 0.000 |

12 Note: \* $p < 0.05$ , \*\* $p < 0.01$ , \*\*\* $p < 0.001$ ; DERS, difficulties in emotion regulation; UPPS-  
 13 P, impulsivity; CES-D, depression; EES-R, emotional eating

## 1 **Mediation analysis**

2       The PROCESS macro of SPSS was suitable for the analysis of the effects of mediation  
3 and for chain mediation models with multiple mediating variables[62]. Therefore, we used  
4 Model 6 in the PROCESS macro of SPSS to analyze the chain mediation effect of  
5 impulsivity and depressive symptoms between difficulties in emotion regulation and  
6 emotional eating. Taking emotion regulation difficulties as the independent variable,  
7 emotional eating as the dependent variable, and impulsivity and depressive symptoms as  
8 the mediating variable, the chain mediation effect test yielded the results shown in Fig 1  
9 and Table 4. Our study examined the gender, age, grade and income mediating effects as  
10 control variables. The results show that difficulties in emotion regulation have a  
11 significant indirect effect on emotional eating through impulsivity ( $\beta= 0.1172$ , 95% CI=  
12 [0.07,0.17]); that is, impulsivity has a significant mediating effect on the relationship  
13 between emotional regulation difficulties and emotional eating. Thus, difficulties in  
14 emotion regulation have significant indirect effects on emotional eating through  
15 depressive symptoms ( $\beta= 0.1316$ , 95% CI= [0.07, 0.20]); that is, depressive symptoms  
16 have a significant mediating effect on the relationship between difficulties in emotion  
17 regulation and emotional eating. Finally, the indirect effect of difficulties in emotion  
18 regulation on emotional eating through impulsivity and depressive symptoms was  
19 significant ( $\beta= 0.0130$ , 95% CI= [0.00, 0.03]). In other words, impulsivity can affect  
20 depressive symptoms. At the same time, the chain mediation path from difficulties in  
21 emotion regulation to impulsivity, then to depressive symptoms, and finally to emotional  
22 eating is significant, supporting Hypothesis 2. The results indicate that impulsivity and  
23 depressive symptoms play a continuous mediating role in the relationship between  
24 difficulties in emotion regulation and emotional eating.

25 **Fig 1. The role of impulsivity and depressive symptoms as chain mediators in the**

1 **relationship between emotion regulation difficulties and emotional eating with**  
 2 **standardized beta.** Note: \*\*\* $p < 0.001$ . Values on paths are path coefficients (standardized  
 3  $\beta$ s).

4 **Table 4 Chain-Mediated Effects of Difficulties in Emotion Regulation on Emotional**  
 5 **Eating Through Impulsivity and Depressive Symptoms**

| Effect                          | Product of Coefficients |         | Bootstrapping 95% BC<br>Confidence Interval (CI) |    |              |    |
|---------------------------------|-------------------------|---------|--------------------------------------------------|----|--------------|----|
|                                 | Effect                  | Boot SE | Boot<br>(CI)                                     | LL | Boot<br>(CI) | UL |
| Total indirect effect of X on Y | 0.2608                  | 0.0443  | 0.1726                                           |    | 0.3449       |    |
| Indirect effect 1: X→M1→Y       | 0.1167                  | 0.0247  | 0.0689                                           |    | 0.1663       |    |
| Indirect effect 2: X→M2→Y       | 0.1311                  | 0.0317  | 0.0687                                           |    | 0.1920       |    |
| Indirect effect 3: X→M1→M2→Y    | 0.129                   | 0.0060  | 0.0026                                           |    | 0.0259       |    |

6 Note: N = 494. Number of bootstrap samples for bias corrected bootstrap confidence  
 7 intervals: 5000. Level of confidence for all confidence intervals: 95%. X = emotion  
 8 regulation difficulties; M1=impulsivity; M2=depressive symptoms, and Y=emotional  
 9 eating. Covariates included the caregiver's age, gender, education and average monthly  
 10 income.

## 11 **Discussion**

### 12 **The status of emotional eating**

13 In our study, the average score of emotional eating among undergraduate students was  
 14 61, higher than the score 52 in Shi's study[63]. Our results showed that the senior students  
 15 were more likely to engage in emotional eating. It can be explained that, the senior students  
 16 usually face more employment and academic pressure as they are near the graduation[64].  
 17 The current data pointed out that male have a higher level of emotional eating than female,

1 which is contrary to some previous studies[6, 65]. It can be explained that women are more  
2 concerned with weight control and body shape maintenance[66]. Average monthly income  
3 is also a factor that influences emotional eating in our study, the lower income indicates  
4 higher level of emotional eating, which is consistent with a previous report[67].  
5 Hemmingsson's theory emphasized that low income may cause negative mood, which  
6 finally induce eating energy-dense foods to alleviate negative emotions and stress [68].  
7 Burdick proved that lower income is associated with greater impulsivity[69]. While people  
8 with higher impulsivity were influenced deeply by negative emotions, which was appeared  
9 as the cause of emotional eating[70].

## 10 **Difficulties in emotion regulation are positively correlated with** 11 **emotional eating**

12 Based on our study, difficulties in emotion regulation had a positive predictive effect  
13 on emotional eating, which verifies H1. People who have difficulties in emotion regulation  
14 are more likely rapped in negative emotions[71]. A review reported that people with  
15 depression use less emotion regulation strategies[72]. People with difficulties in emotion  
16 regulation cannot understand the feelings they have, and this lack of emotional clarity make  
17 for eating disorder[73]. Difficulties in emotion regulation lead an inability to deal with  
18 tasks[74] and to use effective regulatory strategies[57], after then increase the probability  
19 for eating as an attempt to escape from the averse emotional states[48]. Under the negative  
20 circumstances, people choose eating as a strategy because they can feel happy in this way  
21 [75], moreover, eating more calories in the first 5 minutes can make them more positive[76].  
22 Dopamine is a probable explanation; eating increases dopamine release by glutamatergic  
23 projection to the ventral tegmental area mediates and NMDA receptor, which then causes  
24 the feeling of pleasure to people.[77, 78]. Above all, emotion regulation showed a positive  
25 connection with emotional eating.

## 1 **The relationship between difficulties in emotion regulation and** 2 **emotional eating is mediated by impulsivity**

3 The current study found that impulsivity played a mediating role between difficulties  
4 in emotion regulation and emotional eating, which verifies H2. Valente (2017) suggested  
5 that emotional eating is an iceberg top of a three-step ladder and that the hidden base of the  
6 iceberg is represented by both emotional dysregulation and the level of impulsivity [79].  
7 Difficulties in emotion regulation especially impulse control may decrease DAD<sub>2</sub> receptor  
8 availability in the striatum and result in lower DA-ergic activity, which signified a tendency  
9 of impulsivity[80]. Bratec (2017) found that difficulties in emotion regulation reduce the  
10 influence of Prefrontal Cortex on ventral striatal aPE signals after then change the normal  
11 status of striatum[81]. Individuals who cannot activate striatal circuits appropriately,  
12 perhaps have impaired self-regulatory control, which contributes to impulsive  
13 behaviors[82]. Overeating behavior has been confirmed to have association with  
14 impulsivity[83]. Impulsivity may contribute to overeating in situations of uncontrolled  
15 emotion[84]. Thus, difficulties in emotion regulation can induce emotional eating through  
16 impulsivity.

## 17 **The relationship between difficulties in emotion regulation and** 18 **emotional eating is mediated by depressive symptoms**

19 The current study found that depressive symptoms played a mediating role between  
20 difficulties in emotion regulation and emotional eating, consistent with previous studies  
21 [85], which verifies H3. Martin et al proved the difficulties in emotion regulation may be  
22 a predictor of depression in general adults[86]. Difficulties in emotion regulation would  
23 lead to added negative moods and might result in depressive symptoms after some time  
24 [87, 88]. Longitudinal research found that eating can be a way to temporarily numb



1 uncomfortable emotions, such as depression. Individuals who experiencing depression  
2 may use food as entertainment[89]. Eating triggered by depression was closely associated  
3 with emotion regulation difficulties[48]. It is possible that when in negative emotions (e.g.,  
4 depression), individuals would increase eating behavior as a strategy for regulating. The  
5 5-HTTLPR is proved to be associated with depression[90]. Additionally, a study proved  
6 that adolescents with depressive symptoms showed more increase in emotional eating if  
7 they carried the 5-HTTLPR genotype[91]. Thus, difficulties in emotion regulation can  
8 induce emotional eating through depression.

## 9 **Impulsivity and depressive symptoms are chain mediators in the** 10 **relationship between difficulties in emotion regulation and** 11 **emotional eating**

12 Our results showed the chain mediation of difficulties in emotion regulation on  
13 emotional eating through impulsivity and depressive symptoms, which verifies H4. The  
14 results of our research is consistent with previous study, which proved that impulsivity can  
15 predict the onset of depression as a distinct personality factor in adults by logistic  
16 regression model[54]. Individuals who have difficulties in emotion regulation are at  
17 significant risk of using inappropriate strategies to cope with life events[92]. Past research  
18 found that the higher emotion dysregulation group scored significantly higher on  
19 impulsivity[93]. Low levels of 5-HT and 5-HIAA were found in people classified as  
20 impulsive[94-96] and levels of 5-HT and 5-HIAA have positive relationship with severity  
21 of depression and could be good markers for evaluating depression[97]. Our results  
22 suggested that difficulties in emotion regulation may have a tendency toward impulsivity  
23 and depression. By effectively acting as mediators through impulsivity and depressive  
24 symptoms, people might have emotional eating when have difficulties in emotion  
25 regulation[98]. The current study is the first to document a sequential process in which

1 difficulties in emotion regulation affect impulsivity, which in turn predicts depression and  
2 thus over eating.

### 3 **Limitation**

4 One limitation of the study is that the results cannot be generalized to overall  
5 population, because undergraduate students differ in social pressure and environment from  
6 others. The sample was underrepresented to demonstrate the overall situation of college  
7 students in China because the sample size is limited and sample sources cannot cover all  
8 regions of China. Emotional eating, emotion regulation, impulsivity and depressive  
9 symptoms were measured by self-report, the results are not as accurate as laboratory studies  
10 or observational measures in daily routine. We can't make sure that each participant  
11 understands the question well and if they wrote a wrong answer which was Different from  
12 the reality. The participants may have false memories or lie to us.

13 A laboratory studies or observational measures is needed to assess emotional eating,  
14 difficulties in emotion regulation, impulsivity and depressive symptoms to further explore  
15 this research question. Future studies should investigate the different results of emotional  
16 eating after intervening in the two mediation variables in the current study to explore the  
17 impact on emotional overeating.

### 18 **Conclusion**

19 Through our study, it can be seen that the state of emotional eating among Chinese  
20 university students is grim. The status of emotional eating seems to be associated with  
21 difficulties in emotion regulation. It is time to explore the relationship because emotional  
22 eating can increase the risk of obesity and other diseases. The relationship between  
23 difficulties in emotion regulation and emotional eating is mediated by impulsivity and  
24 depression symptoms, respectively. In addition, impulsivity and depressive symptoms are  
25 chain mediators in the relationship between the two. The current study provides data

1 support for improving the status of emotional eating and the reference direction for the  
2 formulation of interventions.

### 3 **Acknowledgement**

4 We wish to thank all the college students who take part in our questionnaire  
5 investigation. Funding from the Peking University Students Innovation Project is also  
6 gratefully acknowledged.

### 7 **References**

- 8 1. Arlington VA. American Psychiatric Association: Diagnostic and Statistical Manual  
9 of Mental Disorders, Fifth Edition 2013.
- 10 2. Santomauro DF, Melen S, Mitchison D, Vos T, Ferrari AJ. The hidden burden of  
11 eating disorders: an extension of estimates from the Global Burden of Disease Study  
12 2019. *The Lancet Psychiatry*. 2021;8(4).
- 13 3. Alpers GW, Tuschen-Caffier B. Negative feelings and the desire to eat in bulimia  
14 nervosa. 2001;2(4):0-352.
- 15 4. Bruch H. *Eating disorders: obesity, anorexia nervosa, and the person within*. New  
16 York: Basic Books; 1973.
- 17 5. Ganley RM. Emotion and eating in obesity: A review of the literature. *The*  
18 *International journal of eating disorders*. 1989;8(3):343-61.
- 19 6. Liu H, Yang Q, Luo J, Ouyang Y, Sun M, Xi Y, et al. Association between  
20 Emotional Eating, Depressive Symptoms and Laryngopharyngeal Reflux Symptoms in  
21 College Students: A Cross-Sectional Study in Hunan. *Nutrients*. 2020;12(6).
- 22 7. Barak RE, Shual K, Li Q, Oetjen R, Harding M. Emotional Eating in Adults: the  
23 Role of Socio-demographics, Lifestyle Behaviors, and Self-regulation- Findings From a  
24 US National Study. 2020.

- 1 8. Ashley C, Selena NR, Gray VB, Wendy R, Caitlin P, Donna SM. Academic-Related  
2 Factors and Emotional Eating in Adolescents. *J Sch Health*. 2018;88(7):493-9.
- 3 9. Koenders PG, Strien TV. Emotional Eating, Rather Than Lifestyle Behavior, Drives  
4 Weight Gain in a Prospective Study in 1562 Employees. *Journal of Occupational &*  
5 *Environmental Medicine*. 2011;53(11):1287.
- 6 10. Dohle S, Hartmann C, Keller C. Physical activity as a moderator of the association  
7 between emotional eating and BMI: Evidence from the Swiss Food Panel. *Psychol*  
8 *Health*. 2014;29(9):1062-80.
- 9 11. Frayn M, Knäuper B. Emotional Eating and Weight in Adults: a Review. *Current*  
10 *Psychology*. 2017.
- 11 12. Canetti L, Berry EM, Elizur Y. Psychosocial predictors of weight loss and  
12 psychological adjustment following bariatric surgery and a weight-loss program: the  
13 mediating role of emotional eating. *Int J Eat Disord*. 2010;42.
- 14 13. Delahanty LM, Peyrot M, Shrader PJ, Williamson DA, Nathan DM. Pretreatment,  
15 Psychological, and Behavioral Predictors of Weight Outcomes Among Lifestyle  
16 Intervention Participants in the Diabetes Prevention Program (DPP). *Diabetes care*.  
17 2012;36(1).
- 18 14. Teixeira PJ, Silva MN, Countinho SR. Mediators of weight loss and weight loss  
19 maintenance in middle-age women. 2009.
- 20 15. Lavender JM, Wonderlich SA, Engel SG, Gordon KH, Kaye WH, Mitchell JE.  
21 Dimensions of emotion dysregulation in anorexia nervosa and bulimia nervosa: A  
22 conceptual review of the empirical literature. *Clinical psychology review*. 2015;40:111-  
23 22.
- 24 16. Shriver LH, Dollar JM, Calkins SD, Keane SP, Shanahan L, Wideman L. Emotional  
25 Eating in Adolescence: Effects of Emotion Regulation, Weight Status and Negative Body  
26 Image. *Nutrients*. 2021;13(1):79.

- 1 17. Polivy J, Herman CP. Causes of eating disorders. Annual review of psychology.  
2 2002;53(1):187-213.
- 3 18. Lambert KG. Handbook of Emotion Regulation. JAMA : the journal of the  
4 American Medical Association. 2007;298(15):1805-10.
- 5 19. Jakubczyk A, Trucco EM, Kopera M, Kobylński P, Suszek H, Fudalej S, et al. The  
6 association between impulsivity, emotion regulation, and symptoms of alcohol use  
7 disorder. J Subst Abuse Treat. 2018;91:49-56.
- 8 20. Ehring T, Tuschen-Caffier B, Schnülle J, Fischer S, Gross JJ. Emotion Regulation  
9 and Vulnerability to Depression: Spontaneous Versus Instructed Use of Emotion  
10 Suppression and Reappraisal. Emotion (Washington, DC). 2010;10(4):563-72.
- 11 21. Leigh Gibson E. Emotional influences on food choice: Sensory, physiological and  
12 psychological pathways. Physiology & behavior. 2006;89(1):53-61.
- 13 22. Pink A, Williams C, Lee M. Exploring the relationships between alexithymia,  
14 impulsivity, emotional eating and BMI. Appetite. 2016;107:689-.
- 15 23. Moeller FG, Barratt ES, Dougherty DM, Schmitz JM, Swann AC. Psychiatric  
16 Aspects of Impulsivity. American Journal of Psychiatry. 2001;158(11):1783-93.
- 17 24. Patton JH, Stanford MS, Barratt ES. Factor structure of the Barratt impulsiveness  
18 scale. Journal of Clinical Psychology. 1995;51(6):768-74.
- 19 25. Oliver C, Adams D, Allen D, Bull L, Heald M, Moss J, et al. Causal Models of  
20 Clinically Significant Behaviors in Angelman, Cornelia de Lange, Prader–Willi and  
21 Smith–Magenis Syndromes - ScienceDirect. International Review of Research in  
22 Developmental Disabilities. 2013;44:167-211.
- 23 26. Santos LM, Silva A, Brasil A, Tolentino A, Norberto CA, Paula C, et al. Impulsivity  
24 prevalence in migraine patients without and with medication overuse. Academia  
25 Brasileira de Neurologia - ABNEURO. 2020(12).

- 1 27. Chamorro J, Bernardi S, Potenza MN, Grant JE, Marsh R, Wang S, et al. Impulsivity  
2 in the general population: A national study. *Journal of Psychiatric Research*.  
3 2012;46(8):994-1001.
- 4 28. Oliver C, Berg K, Moss J, Arron K, Burbidge C. Delineation of behavioral  
5 phenotypes in genetic syndromes: characteristics of autism spectrum disorder, affect and  
6 hyperactivity. *J Autism Dev Disord*. 2011;41(8):1019-32.
- 7 29. Shuhong Q, Ying C, Shiwei H. Relationship among depressive symptoms,  
8 neuroticism and network social activities in college students. *Chinese Mental Health*  
9 *Journal*. 2019;33(12):6.
- 10 30. Dennis C-L, Dowswell T. Interventions (other than pharmacological, psychosocial or  
11 psychological) for treating antenatal depression. *Cochrane database of systematic*  
12 *reviews*. 2013(7):CD006795.
- 13 31. Wu Pengxia, Xu Xiaomin. Research progress on influencing factors of depression in  
14 college students. *Clinical Research and Practice*. 2020;5(14):196-8.
- 15 32. Acharya L, Jin L, Collins W. College life is stressful today - Emerging stressors and  
16 depressive symptoms in college students. *Journal of American college health*.  
17 2018;66(7):655-64.
- 18 33. Yang T, Wu D, Zhang W, Cottrell RR, Rockett IRH. Comparative stress levels  
19 among residents in three Chinese provincial capitals, 2001 and 2008. *PloS one*.  
20 2012;7(11):e48971-e.
- 21 34. Liu Meng JM, Ni Fangduan, Ma Saifeng. A survey of depression among college  
22 students in Gansu Province. *SOUTH CHINA JOURNAL OF PREVENTIVE*  
23 *MEDICINE*. 2019;45(1):69-72.
- 24 35. Stice E, Bearman SK. Body-Image and Eating Disturbances Prospectively Predict  
25 Increases in Depressive Symptoms in Adolescent Girls: A Growth Curve Analysis.  
26 *Developmental psychology*. 2001;37(5):597-607.

- 1 36. Crockett AC, Myhre SK, Rokke PD. Boredom proneness and emotion regulation  
2 predict emotional eating. *Journal of health psychology*. 2015;20(5):670-80.
- 3 37. Gianini LM, White MA, Masheb RM. Eating pathology, emotion regulation, and  
4 emotional overeating in obese adults with binge eating disorder. *Eating behaviors : an  
5 international journal*. 2013;14(3):309-13.
- 6 38. Heatherton, T. F, Baumeister, R. F. Binge eating as escape from self-awareness.  
7 *Psychological Bulletin*. 1991.
- 8 39. Sonja, Blackburn, Lucy, Johnston, Neville, Blampied, et al. An application of escape  
9 theory to binge eating. *European Eating Disorders Review*. 2006.
- 10 40. Casagrande M, Boncompagni I, Forte G, Guarino A, Favieri F. Emotion and  
11 overeating behavior: effects of alexithymia and emotional regulation on overweight and  
12 obesity. *Eating and weight disorders*. 2019;25(5):1333-45.
- 13 41. Micanti F, Iasevoli F, Cucciniello C, Costabile R, Loiarro G, Pecoraro G, et al. The  
14 relationship between emotional regulation and eating behaviour: a multidimensional  
15 analysis of obesity psychopathology. *Eating and weight disorders*. 2016;22(1):105-15.
- 16 42. Weiss NH, Tull MT, Viana AG, Anestis MD, Gratz KL. Impulsive behaviors as an  
17 emotion regulation strategy: Examining associations between PTSD, emotion  
18 dysregulation, and impulsive behaviors among substance dependent inpatients. *Journal of  
19 anxiety disorders*. 2012;26(3):453-8.
- 20 43. Benzerouk F, Djerada Z, Bertin E, Barrière S, Gierski F, Kaladjian A. Contributions  
21 of Emotional Overload, Emotion Dysregulation, and Impulsivity to Eating Patterns in  
22 Obese Patients with Binge Eating Disorder and Seeking Bariatric Surgery. *Nutrients*.  
23 2020;12(10).
- 24 44. Joormann J, Gotlib IH. Emotion regulation in depression: relation to cognitive  
25 inhibition. *Cognition & Emotion*. 2010;24(2):281.

- 1 45. Ehring T, Fischer S, Schnulle J, B?Sterling A, Tuschen-Caffier B. Characteristics of  
2 emotion regulation in recovered depressed versus never depressed individuals.  
3 *Personality and Individual Differences*. 2008;44(7):1574-84.
- 4 46. Schäfer J, Naumann E, Holmes EA, Tuschen-Caffier B, Samson AC. Emotion  
5 Regulation Strategies in Depressive and Anxiety Symptoms in Youth: A Meta-Analytic  
6 Review. *J Youth Adolesc*. 2017;46(2):261-76.
- 7 47. Campbell-Sills L, Barlow DH, Brown TA, Hofmann SG. Acceptability and  
8 Suppression of Negative Emotion in Anxiety and Mood Disorders. *Emotion*  
9 (Washington, DC). 2006;6(4):587-95.
- 10 48. Braden A, Musher-Eizenman D, Watford T, Emley E. Eating when depressed,  
11 anxious, bored, or happy: Are emotional eating types associated with unique  
12 psychological and physical health correlates? *Appetite*. 2018.
- 13 49. Kontinen H, Mnnist S, Sarlio-LäHteenkorva S, Silventoinen K, Haukkala A.  
14 Emotional eating, depressive symptoms and self-reported food consumption. A  
15 population-based study. *Appetite*. 2010;54(3):473-9.
- 16 50. Leehr EJ, Schag K, Dresler T, Grosse-Wentrup M, Hautzinger M, Fallgatter AJ, et  
17 al. Food specific inhibitory control under negative mood in binge-eating disorder:  
18 Evidence from a multimethod approach. *The International journal of eating disorders*.  
19 2018;51(2):112-23.
- 20 51. Rose MH, Nadler EP, Mackey ER. Impulse Control in Negative Mood States,  
21 Emotional Eating, and Food Addiction are Associated with Lower Quality of Life in  
22 Adolescents with Severe Obesity. *Journal of pediatric psychology*. 2018;43(4):443-51.
- 23 52. Moeller, Gerard F, Barratt, Ernest, S., Dougherty, et al. Psychiatric Aspect of  
24 Impulsivity. *American Journal of Psychiatry*. 2001.



- 1 53. Ceschi G, Billieux J, Hearn M, Fürst G, Van der Linden M. Trauma exposure  
2 interacts with impulsivity in predicting emotion regulation and depressive mood.  
3 European journal of psychotraumatology. 2014;5(1):24104-10.
- 4 54. Granö N, Keltinkangasjärvinen L, Kouvonen A, Virtanen M, Elovainio M, Vahtera  
5 J, et al. Health and Disability. Impulsivity as a predictor of newly diagnosed depression.  
6 2007.
- 7 55. Guohui Z, Jihua Z, Chunyan Z, Hongxue X, Guizhen J. Reliability and validity of  
8 Inlow's 60-second diabetic foot screening tool. Diabetes world. 2020.
- 9 56. Hong Z. The Revision of the Emotional Eating Scale and the Applied Research.  
10 Central South University. 2012.
- 11 57. Gratz KL, Roemer L. Multidimensional Assessment of Emotion Regulation and  
12 Dysregulation: Development, Factor Structure, and Initial Validation of the Difficulties  
13 in Emotion Regulation Scale. Journal of Psychopathology & Behavioral Assessment.  
14 2008;30(4):315-.
- 15 58. Lynam DR. Development of a short form of the UPPS-P Impulsive Behavior Scale.  
16 2013.
- 17 59. Radloff, L. S. The CES-D Scale A Self-Report Depression Scale for Research in the  
18 General Population. Applied Psychological Measurement. 1977;1(3):385-401.
- 19 60. Herman CP, Polivy J. Psychological factors in the control of appetite. Current  
20 concepts in nutrition. 1988;16:41.
- 21 61. Hayes AF. Introduction to Mediation, Moderation, and Conditional Process  
22 Analysis: A Regression-Based Approach: Introduction to Mediation, Moderation, and  
23 Conditional Process Analysis: A Regression-Based Approach; 2013.
- 24 62. Harrist AW, Hubbs-Tait L, Topham GL, Shriver LH, Page MC. Emotion Regulation  
25 is Related to Children's Emotional and External Eating. Journal of Developmental &  
26 Behavioral Pediatrics. 2013;34(8):557-65.

- 1 63. Banna JC, Panizza CE, Boushey CJ, Delp EJ, Lim E. Association between Cognitive  
2 Restraint, Uncontrolled Eating, Emotional Eating and BMI and the Amount of Food  
3 Wasted in Early Adolescent Girls. *Nutrients*. 2018;10(9).
- 4 64. Li Haishuang. A Study of Problematic Internet Use, Depression, Loneliness and  
5 Their Relationships in College Students of Guangzhou 2014.
- 6 65. Bemanian M, Mland S, Blomhoff R, Rabben SK, Fadnes LT. Emotional Eating in  
7 Relation to Worries and Psychological Distress Amid the COVID-19 Pandemic: A  
8 Population-Based Survey on Adults in Norway. *International Journal of Environmental  
9 Research and Public Health*. 2020;18.
- 10 66. Lu Q, Tao F, Hou F, Zhang Z, Ren LL. Emotion regulation, emotional eating and the  
11 energy-rich dietary pattern. A population-based study in Chinese adolescents. *Appetite*.  
12 2016;99:149-56.
- 13 67. Al-Musharaf S. Prevalence and Predictors of Emotional Eating among Healthy  
14 Young Saudi Women during the COVID-19 Pandemic. *Nutrients*. 2020;12(10):1-17.
- 15 68. Spinosa J, Christiansen P, Dickson JM, Lorenzetti V, Hardman CA. From  
16 Socioeconomic Disadvantage to Obesity: The Mediating Role of Psychological Distress  
17 and Emotional Eating. *Obesity (Silver Spring, Md)*. 2019;27(4):559-64.
- 18 69. Burdick JD, Roy AL, Raver CC. Evaluating the Iowa Gambling Task as a direct  
19 assessment of impulsivity with low-income children. *Personality and individual  
20 differences*. 2013;55(7):771-6.
- 21 70. Bekker M, Meerendonk C, Mollerus J. Effects of negative mood induction and  
22 impulsivity on self-perceived emotional eating. *International Journal of Eating Disorders*.  
23 2004;36(4):461-9.
- 24 71. Fearey E, Evans J, Schwartz-Mette RA. Emotion regulation deficits and depression-  
25 related maladaptive interpersonal behaviours. *Cogn Emot*. 2021;35(8):1559-72.

- 1 72. Liu DY, Thompson RJ. Selection and implementation of emotion regulation  
2 strategies in major depressive disorder: An integrative review. *Clinical Psychology*  
3 *Review*. 2017;57.
- 4 73. Gianini LM, White MA, Masheb RM. Eating pathology, emotion regulation, and  
5 emotional overeating in obese adults with Binge Eating Disorder. *Eating Behaviors*.  
6 2013;14(3):309-13.
- 7 74. Braden A, Musher-Eizenman D, Watford T, Emley E. Eating when depressed,  
8 anxious, bored, or happy: Are emotional eating types associated with unique  
9 psychological and physical health correlates? *Appetite*. 2018;125:410-7.
- 10 75. Macht M. Emotion-induced changes of eating: the role of emotions. *Zeitschrift für*  
11 *Psychologie*. 2005;213(1):9-22.
- 12 76. Peggy, Bongers, and, Anita, Jansen, and, et al. Happy eating. The underestimated  
13 role of overeating in a positive mood - ScienceDirect. *Appetite*. 2013;67(1):74-80.
- 14 77. Breuning, L. Five ways to boost your natural happy chemicals (dopamine, serotonin,  
15 oxytocin, endorphins, and cortisol). *Townsend Letter*.363:108.
- 16 78. Westerink B, Kwint HF, Vries J. Eating-Induced Dopamine Release from  
17 Mesolimbic Neurons Is Mediated by NMDA Receptors in the Ventral Tegmental Area: A  
18 Dual-Probe Microdialysis Study. *Journal of Neurochemistry*. 1997;69(2):662-8.
- 19 79. Valente S, Di Girolamo G, Cerrato F, Vannucci L, De Ronchi D, Atti AR. The eating  
20 disorders iceberg: Emotional deregulation and impulsivity lay below. *European*  
21 *psychiatry*. 2017;41(S1):S314-S5.
- 22 80. Robbins TW, Gillan CM, Smith DG, de Wit S, Ersche KD. Neurocognitive  
23 endophenotypes of impulsivity and compulsivity: towards dimensional psychiatry.  
24 *Trends in cognitive sciences*. 2011;16(1):81-91.

- 1 81. Mulej Bratec S, Xie X, Wang Y, Schilbach L, Zimmer C, Wohlschl?Ger AM, et al.  
2 Cognitive emotion regulation modulates the balance of competing influences on ventral  
3 striatal aversive prediction error signals. *Neuroimage*. 2017;147(Complete):650-7.
- 4 82. Marsh R, Steinglass JE, Gerber AJ, O'Leary KG, Peterson BS. Deficient activity in  
5 the neural systems that mediate self-regulatory control in bulimia nervosa. *Archives of*  
6 *General Psychiatry*. 2008;66(1):51-63.
- 7 83. Vanderbroek-Stice L, Stojek MK, Beach S, Vandellen MR, Mackillop J.  
8 Multidimensional assessment of impulsivity in relation to obesity and food addiction.  
9 *Appetite*. 2017;112:59-68.
- 10 84. A OM, b CC, a CT, B AG, C MVDLA. Obesity and the four facets of impulsivity -  
11 *ScienceDirect. Patient Education and Counseling*. 2010;79(3):372-7.
- 12 85. Prefit A-B, C?ndea DM, Szentagotai-T?tar A. Emotion regulation across eating  
13 pathology: A meta-analysis. *Appetite*. 2019;143:104438-.
- 14 86. Martin RC, Dahlen ER. Cognitive emotion regulation in the prediction of depression,  
15 anxiety, stress, and anger. *Personality and Individual Differences*. 2005;39(7):1249-60.
- 16 87. Berking M, Schwarz J. *Affect Regulation Training*. Springer New York. 2014.
- 17 88. Hofmann SG, Sawyer AT, Fang A, Asnaani A. Emotion dysregulation model of  
18 mood and anxiety disorders. *Cognitive Therapy & Research*. 2012;29(5):409-16.
- 19 89. Kidwell KM, Nelson TD, Nelson JM, Espy KA. A Longitudinal Study of Maternal  
20 and Child Internalizing Symptoms Predicting Early Adolescent Emotional Eating.  
21 *Journal of pediatric psychology*. 2017;42(4):445-56.
- 22 90. Caspi A, Sugden K, Moffitt TE, Taylor A, Craig IW, Harrington H, et al. Influence  
23 of life stress on depression: moderation by a polymorphism in the 5-HTT gene. *Science*.  
24 2003;301(5631):386-9.

- 1 91. van Strien T, van der Zwaluw CS, Engels RC. Emotional eating in adolescents: a  
2 gene (SLC6A4/5-HTT) - depressive feelings interaction analysis. *J Psychiatr Res*.  
3 2010;44(15):1035-42.
- 4 92. El Archi S, Barrault S, Brunault P, Ribadier A, Varescon I. Co-occurrence of Adult  
5 ADHD Symptoms and Problematic Internet Use and Its Links With Impulsivity, Emotion  
6 Regulation, Anxiety, and Depression. *Front Psychiatry*. 2022;13:792206.
- 7 93. Estévez A, Jáuregui P, Sánchez-Marcos I, López-González H, Griffiths MD.  
8 Attachment and emotion regulation in substance addictions and behavioral addictions. *J*  
9 *Behav Addict*. 2017;6(4):534-44.
- 10 94. O., Spreux-Varoquaux, and, J-C., Alvarez, and, et al. Differential abnormalities in  
11 plasma 5-HIAA and platelet serotonin concentrations in violent suicide attempters  
12 Relationships with impulsivity and depression. *Life Sciences*. 2001;69(6):647-57.
- 13 95. Cremniter D, Jamain S, Kollenbach K, Alvarez JC, Spreux-Varoquaux O. CSF 5-  
14 HIAA levels are lower in impulsive as compared to nonimpulsive violent suicide  
15 attempters and control subjects. *Biological Psychiatry*. 1999;45(12):1572.
- 16 96. Stenfors C, Ross S. Changes in extracellular 5-HIAA concentrations as measured by  
17 in vivo microdialysis technique in relation to changes in 5-HT release.  
18 *Psychopharmacology*. 2004;172(2):119-28.
- 19 97. Mitani H, Shirayama Y, Yamada T, Kawahara R. Plasma levels of homovanillic  
20 acid, 5-hydroxyindoleacetic acid and cortisol, and serotonin turnover in depressed  
21 patients. *Prog Neuropsychopharmacol Biol Psychiatry*. 2006;30(3):531-4.
- 22 98. Pap D, Gonda X, Molnar E, Lazary J, Benko A, Downey D, et al. Genetic variants in  
23 the catechol-o-methyltransferase gene are associated with impulsivity and executive  
24 function: Relevance for major depression. *American Journal of Medical Genetics Part B:*  
25 *Neuropsychiatric Genetics*. 2012;159B(8):928-40.



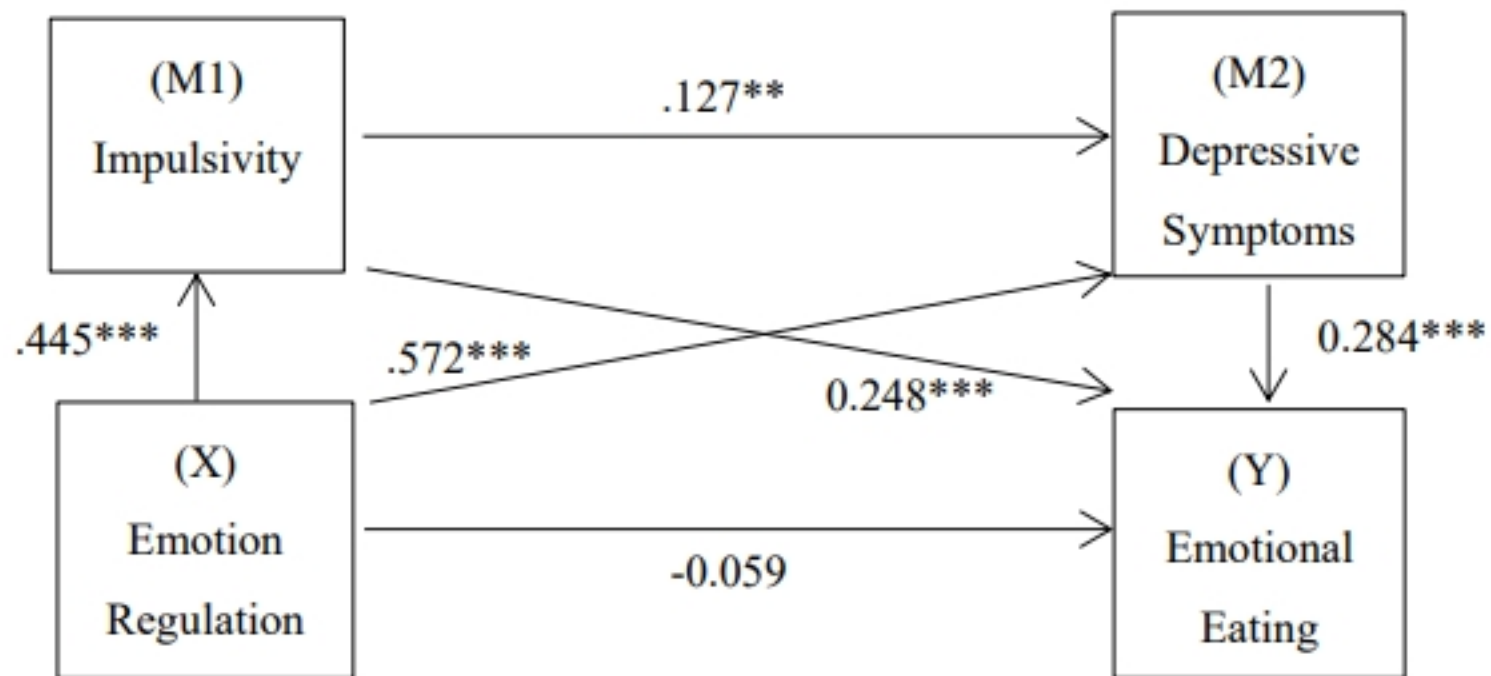

Figure
